1 Effect of continuous anesthetic wound infusion on postoperative activity in patients who underwent midline  
2 laparotomy for gynecological diseases.

3

4 Min Kyung Kim, M.D.<sup>1</sup>; Kidong Kim, M.D.<sup>1\*</sup>; Youngmi Park, M.S.<sup>2</sup>, Dong Hoon Suh, M.D.<sup>1</sup>; Jae Hong No,  
5 M.D.<sup>1</sup>; Yong Beom Kim, M.D.<sup>1</sup>

6

7 <sup>1</sup> Department of Obstetrics and Gynecology, Seoul National University College of Medicine, Seoul National  
8 University Bundang Hospital, Seongnam, Korea

9 <sup>2</sup> Department of Medical Research Collaborating Center, Seoul National University College of Medicine, Seoul  
10 National University Bundang Hospital, Seongnam, Korea

11 \* Correspondence

12

13 **Corresponding author:**

14 Kidong Kim, MD

15 Department of Obstetrics and Gynecology Seoul National University Bundang Hospital

16 82 Gumi-ro, 173 beon-gil, Bundang-gu, Seongnam-si, Gyeonggi-do, 13620, Republic of Korea.

17 Phone: +82-10-6275-7691 / Fax: +82-787-4054

18 E-mail: kidong.kim.md@gmail.com

19

20 **Abstract**

21

22 **Objective**

23 This study aimed to assess whether continuous anesthetic wound infusion (CAWI) increases postoperative  
24 activity in patients who undergo midline laparotomy for gynecological diseases.

25

26 **Methods**

27 This was an unplanned secondary analysis of a randomized controlled trial examining the effect of an activity  
28 tracker with feedback on postoperative activity in patients who underwent midline laparotomy for gynecological  
29 diseases (NCT02025387). Of the 53 patients included in the trial (12 patients used CAWI and 41 patients did  
30 not), 11 patients with CAWI (case group) and 11 without CAWI (control group) were selected by matching the  
31 duration of surgery. We compared the postoperative activity and other endpoints between the case and control  
32 groups.

33

34 **Results**

35 The case and control groups had similar baseline and surgical characteristics. The recovery rate on postoperative  
36 day 4 (step counts at day 4/ daily step counts at preoperative baseline) of the case group was numerically higher,  
37 but not significantly different from that of the control group (58% vs. 44%;  $p=0.450$ ). Least, average and present  
38 pain on postoperative day 2 were lower in the case group than in the control group. Pain on postoperative day 5,  
39 fatigue, gas out, soft blend diet initiation, ileus, and length of hospital stay were similar between the case and  
40 control groups.

41

42 **Conclusions**

43 In this exploratory analysis, CAWI was not associated with increased postoperative activity in patients who  
44 underwent midline laparotomy for gynecological diseases.

45

46 **Key words:** continuous wound infusion system, physical activity monitoring, postoperative physical activity,  
47 postoperative pain

48 **Introduction**

49

50 Postoperative activity is associated with complications and recovery. For example, one systemic review showed  
51 that the amount of postoperative activity is negatively correlated with the length of hospital stay [1]. Bed rest  
52 after surgery increases the chances of pulmonary embolism and deep vein thrombosis [2, 3]

53 It has been suggested that increasing postoperative activity is beneficial. For example, early ambulation after  
54 open abdominal surgery prevents postoperative complications and reduces the length of stay [1]. In patients who  
55 started walking within 3 days after surgery, the time to independent standing and walking was significantly  
56 shortened [4]. Early ambulation also prevents venous thromboembolism [5-7].

57 Postoperative pain is one of the main hurdles in increasing postoperative activity. A negative correlation  
58 between pain and activity after cesarean section was previously reported [8]. Another study reported that  
59 postoperative daytime steps increased as postoperative pain was relieved [9]. Similarly, postoperative pain relief  
60 in hip fracture patients was shown to promote early functional gait recovery [10]. Such a positive correlation  
61 was also seen in patients undergoing knee arthroplasty, where postoperative pain management was associated  
62 with better range of motion, better performance in daily activities, and faster gait speed [11].

63 Continuous anesthetic wound infusion (CAWI) is a device that continuously releases a local anesthetic into the  
64 surgical site. The CAWI has been reported to effectively relieve postoperative pain. According to a meta-  
65 analysis that included 121 randomized controlled trials, CAWI was reported to reduce pain during laparotomy  
66 and sternotomy [12]. In another study, CAWI reduced additive opioid consumption [13]. We also reported that  
67 CAWI reduced pain in patients with gynecologic cancer [14].

68 We hypothesized that CAWI might increase postoperative activity through pain relief. This study therefore  
69 aimed to assess whether CAWI increases postoperative activity in patients who underwent midline laparotomy  
70 for gynecological diseases.

71 **Materials and methods**

72

73 **Study information and population**

74 This is an unplanned secondary analysis of a randomized controlled trial examining the effect of an activity  
75 tracker with feedback on postoperative activity in patients who underwent midline laparotomy for gynecological  
76 diseases [15]. The recovery rate of activity was measured by comparing the number of steps taken before and  
77 after midline laparotomy. The secondary analysis was approved, and the requirement for informed consent was  
78 waived by the Institutional Review Board of our institute (IRB No. B-2108-700-106).

79 The medical records of the 53 patients who participated in the randomized controlled trial were reviewed.  
80 Twelve patients received both CAWI and intravenous patient-controlled analgesia (PCA), but 41 patients  
81 received only intravenous PCA. By considering the duration of surgery as a factor to match patients receiving  
82 CAWI with those receiving PCA alone (nearest matching duration within  $\pm 30$  min), 11 patients with CAWI  
83 (case group) and 11 patients without CAWI (control group) were selected (Figure 1).

84

85 **Objectives**

86 The primary objective was to compare the recovery rate on postoperative day 4 (step counts on postoperative  
87 day 4 divided by the daily step counts at preoperative baseline) between groups. The secondary objectives were  
88 to compare the recovery rate over time, pain measured using the Brief Pain Index (BPI), fatigue measured with a  
89 brief fatigue index (BFI), gas out day, soft blend diet initiation, ileus rate, and length of stay.

90

91 **Statistical methods**

92 The Mann-Whitney test or independent t-test was used to compare continuous variables. Chi-square tests were  
93 used to compare the categorical variables. After conversion to the log scale, a linear mixed model was used to  
94 analyze the recovery rate over time.

95 *P*-value of  $< 0.05$  was considered statistically significant. All analyses were performed using SPSS 25.0 (IBM,  
96 Armonk, NY, USA).

97 **Results**

98

99 **Patient characteristics**

100 The patient characteristics were similar between the case and control groups (Table 1). Specifically, the mean  
101 age was in the mid-50s in both the case and control groups. Height and weight of the case group were similar to  
102 those of the control group. The distribution of the American Society of Anesthesiologists (ASA) score was also  
103 similar between the groups. The duration of surgery was > 3 h, and the incision length was > 20 cm in both  
104 groups. The distribution of the arms in the randomized controlled trial was similar between the case and control  
105 groups.

106

107 **Postoperative outcomes**

108 A comparison of the postoperative outcomes is summarized in Table 2. Step counts at the preoperative baseline  
109 and postoperative day 4 were similar between groups. The recovery rate on postoperative day 4 in the case  
110 group was numerically higher but not significantly different from that of the control group (58% vs. 44%;  
111  $p=0.450$ ).

112 Least, average, and present pain measured with BPI on postoperative day 2 was lower in the case group than in  
113 the control group. However, the BPI scores on postoperative day 5 were similar between groups. Fatigue, gas  
114 out days, soft blend diet initiation days, ileus, and length of stay were all similar between groups.

115

116 **Recovery rate over time**

117 The recovery rate over the postoperative day showed a gradual increase in the case group, but a fluctuation in  
118 the control group (Figure 2). Linear predictions of the log-transformed recovery rate over the postoperative day  
119 were also similar between the case and control groups ( $p = 0.584$ , Figure 3).

120 **Discussion**

121

122 **Main findings of our study**

123 A previous study reported that one of the major reasons for a quick postoperative recovery is controlling acute  
124 postoperative pain [11]. In one study, postoperative activity increased, whereas the pain decreased over time,  
125 after laparotomy surgery. Therefore, we hypothesized that CAWI might increase postoperative activity through  
126 pain relief. However, in this study, the CAWI was not associated with increased postoperative activity. Although  
127 not statistically significant, the recovery rate on postoperative day 4 was higher in the case group than in the  
128 control group. The small sample size could be a reason for the negative results.

129

130 **CAWI reduces pain**

131 In this study, CAWI was associated with reduced pain on postoperative day 2, but not on day 5. Similar results  
132 have been reported in previous studies. For example, a study reported that acute-phase pain control was  
133 effective in the CAWI group, especially for laparotomy surgery [12]. Previous studies also have shown earlier  
134 retention of bowel function and a shorter hospital stay with CAWI [1, 13], but there were no significant  
135 differences observed in our study.

136

137 **Advantages of our study**

138 The strength of our study was that the amount of postoperative activity and degree of postoperative pain could  
139 be quantitatively assessed using an objective number. There have been only a few studies investigating the  
140 relationship between postoperative pain and activity. In our study, activity accuracy was assessed using an  
141 activity tracker and pain through the BPI score. The basal activity was quantified using an activity tracker to  
142 assess the recovery rate.

143

144 **Limitations of our study**

145 A limitation of our study was the possibility of selection bias. Specifically, the CAWI tended to be applied to  
146 longer and major surgeries, which led to differences in characteristics between the two groups. We attempted to  
147 negate the selection bias using duration of surgery as a factor for matching. In addition, the number of patients  
148 included in our study was insufficient to achieve significant results. In future studies, enrolling higher number of

149 participants may yield significant results.

150

151 **Conclusion**

152 In this exploratory analysis, CAWI was not associated with increased postoperative activity in patients who

153 underwent midline laparotomy for gynecological diseases.

154 **Acknowledgments**

155 The authors thank the Division of Statistics in the Medical Research Collaborating Center at Seoul National  
156 University Bundang Hospital for the statistical analysis. We would like to thank Editage ([www.editage.co.kr](http://www.editage.co.kr))  
157 for English language editing.

158

159 **Conflict of interest**

160 There is no potential conflict of interest relevant to this article.

161

162 **Ethical approval**

163 This study was performed after obtaining approval of the Institutional Review Board of Seoul National  
164 University Bundang Hospital (IRB No. B-2108-700-106). This study was performed in accordance with the  
165 principles of the Declaration of Helsinki.

166

167 **Patient consent**

168 Written informed consent and the use of images from the patients were not required for publication.

169

170 **Funding information**

171 None



172 **Table 1.** Patient characteristics

|                                           | Case<br>(N = 11) | Control<br>(N = 11) | p value |
|-------------------------------------------|------------------|---------------------|---------|
| Age, mean $\pm$ SD (years)                | 53.5 $\pm$ 11.1  | 57.5 $\pm$ 9.5      | 0.823   |
| Height, mean $\pm$ SD (cm)                | 153.7 $\pm$ 6.4  | 157.7 $\pm$ 5.9     | 0.492   |
| Weight, mean $\pm$ SD (kg)                | 52.8 $\pm$ 8.2   | 59.8 $\pm$ 7.3      | 0.207   |
| ASA score, n (%)                          |                  |                     | 0.392   |
| 1                                         | 6 (55)           | 4 (36)              |         |
| 2                                         | 5 (45)           | 7 (64)              |         |
| Duration of surgery, median (range) (min) | 235 (190-626)    | 205 (162-615)       | 0.562   |
| *Incision length, mean $\pm$ SD (cm)      | 23.0 $\pm$ 6.4   | 20.6 $\pm$ 4.3      | 0.517   |
| Arm in randomized controlled trial, n (%) |                  |                     | 0.665   |
| Experimental arm                          | 6 (55)           | 7 (64)              |         |
| Control arm                               | 5 (45)           | 4 (36)              |         |

173 \*Based on 18 patients due to missing data. ASA, American Society of Anesthesiologists; SD, standard deviation.

174 **Table 2.** Postoperative outcomes

|                                                          | Case<br>(N = 11)     | Control<br>(N = 11) | p value |
|----------------------------------------------------------|----------------------|---------------------|---------|
| Daily step counts                                        |                      |                     |         |
| Baseline, median (range)                                 | 4053<br>(1203-18548) | 6209<br>(868-17516) | 0.670   |
| Postoperative day 4, mean $\pm$ SD                       | 2864 $\pm$ 2074      | 2389 $\pm$ 1916     | 0.583   |
| Recovery rate at postoperative day 4, median (range) (%) | 58 (3.5-201.1)       | 44 (0.4-247.5)      | 0.450   |
| BPI at postoperative day 2                               |                      |                     |         |
| Worst in the last 24 h, mean $\pm$ SD                    | 7.1 $\pm$ 2.0        | 8.1 $\pm$ 1.7       | 0.217   |
| Least in the last 24 h, median (range)                   | 2 (0-7)              | 4 (2-9)             | 0.016   |
| Average, median (range)                                  | 4 (2-8)              | 5 (4-10)            | 0.047   |
| Present, mean $\pm$ SD                                   | 4.1 $\pm$ 2.3        | 6.3 $\pm$ 2.1       | 0.029   |
| BPI at postoperative day 5                               |                      |                     |         |
| Worst in the last 24 h, median (range)                   | 3 (0-6)              | 7 (3-10)            | 0.813   |
| Least in the last 24 h, median (range)                   | 5 (4-8)              | 2 (1-5)             | 0.681   |
| Average, mean $\pm$ SD                                   | 4.9 $\pm$ 1.4        | 4.8 $\pm$ 2.0       | 0.904   |
| Present, mean $\pm$ SD                                   | 4.0 $\pm$ 1.8        | 4.5 $\pm$ 1.8       | 0.638   |
| BFI at postoperative day 5                               |                      |                     |         |
| Present, median (range)                                  | 5 (5-7)              | 5 (3-9)             | 0.754   |
| Usual during past 24 h, median (range)                   | 5 (4-8)              | 5 (3-8)             | 0.151   |
| Worst during past 24 h, mean $\pm$ SD                    | 7.5 $\pm$ 1.9        | 6.8 $\pm$ 2.3       | 0.491   |
| Gas out day, mean $\pm$ SD                               | 3.3 $\pm$ 1.1        | 3.1 $\pm$ 0.8       | 0.426   |
| Soft blend diet initiation, median (range)               | 2 (1-4)              | 1 (1-5)             | 0.680   |
| Ileus, n (%)                                             | 1/11 (9)             | 0/11(0)             | 0.306   |
| Length of stay, (days), mean $\pm$ SD                    | 14.0 $\pm$ 15.2      | 12.0 $\pm$ 4.6      | 0.418   |

175 BPI, Brief Pain Inventory; BFI, Brief Fatigue Inventory; SD, standard deviation

176 **Figure legends**

177

178 **Figure 1.** Schematic flow of patient selection criteria

179

180 **Figure 2.** Recovery rate over postoperative days

181 The recovery rate over the postoperative day showed a gradual increase in the case group, but a fluctuation in  
182 the control group.

183

184 **Figure 3.** Linear prediction of log-transformed recovery rate

185 Linear predictions of the log-transformed recovery rate over the postoperative day were similar between the case  
186 and control groups.

187 **References**

- 188 [1] Abeles A, Kwasnicki RM, Pettengell C, Murphy J, Darzi A. The relationship between physical activity  
189 and post-operative length of hospital stay: A systematic review. *Int J Surg*. 2017;44:295-302.
- 190 [2] S. Vachirasrisirikul, K. Laohapensang. Incidence and Risk Factors of Venous Thromboembolism  
191 Following Major Abdominal Surgery. *J Med Assoc Thai*. 2016;99(6):665-74.
- 192 [3] Golemi I, Salazar Adum JP, Tafur A, Caprini J. Venous thromboembolism prophylaxis using the  
193 Caprini score. *Dis Mon*. 2019;65(8):249-98.
- 194 [4] Hayashi K, Hirashiki A, Kodama A, Kobayashi K, Yasukawa Y, Shimizu M, et al. Impact of  
195 preoperative regular physical activity on postoperative course after open abdominal aortic aneurysm surgery.  
196 *Heart Vessels*. 2016;31(4):578-83.
- 197 [5] A. Ahmed. Prevention of deep vein thrombosis and pulmonary embolism in the perioperative period: a  
198 review. *J Pak Med Assoc*. 2005;55(8):343-7.
- 199 [6] S.R. Kahn, I. Shrier, C. Kearon. Physical activity in patients with deep venous thrombosis: a  
200 systematic review. *Thromb Res*. 2008;122(6):763-73.
- 201 [7] J. Saleh, M.M. El-Othmani, K.J. Saleh. Deep Vein Thrombosis and Pulmonary Embolism  
202 Considerations in Orthopedic Surgery. *Orthop Clin North Am*. 2017;48(2):127-35.
- 203 [8] Marcus H, Gerbershagen HJ, Peelen LM, Aduckathil S, Kappen TH, Kalkman CJ, et al. Quality of  
204 pain treatment after caesarean section: Results of a multicentre cohort study. *Eur J Pain*. 2015;19(7):929-39.
- 205 [9] Sharpe EE, Booth JL, Houle TT, Pan PH, Harris LC, Aschenbrenner CA, et al. Recovery of physical  
206 activity after cesarean delivery and its relationship with pain. *Pain*. 2019;160(10):2350-7.
- 207 [10] M. Elboim-Gabyzon, S. Andrawus Najjar, H. Shtarker. Effects of transcutaneous electrical nerve  
208 stimulation (TENS) on acute postoperative pain intensity and mobility after hip fracture: A double-blinded,  
209 randomized trial. *Clin Interv Aging*. 2019;14:1841-50.
- 210 [11] Dubljanin Raspopović E, Meissner W, Zaslansky R, Kadija M, Tomanović Vujadinović S, Tulić  
211 G. Associations between early postoperative pain outcome measures and late functional outcomes in patients  
212 after knee arthroplasty. *PLoS One*. 2021;16(7):e0253147.
- 213 [12] Huang XZ, Zhao JH, Gao P, Chen XW, Song YX, Xu Y, et al. Continuous Wound Infiltration with  
214 Local Anesthetic Is an Effective and Safe Postoperative Analgesic Strategy: A Meta-Analysis. *Pain Ther*.  
215 2021;10(1):525-38.

- 216 [13] X. Zheng, X.J. Cai. [Study on the effectiveness of continuous local infiltration analgesia and related  
217 short-term prognosis after laparotomy]. *Zhonghua Liu Xing Bing Xue Za Zhi*. 2013;34(11):1125-7.
- 218 [14] Lee B, Kim K, Ahn S, Shin HJ, Suh DH, No JH, et al. Continuous wound infiltration system for  
219 postoperative pain management in gynecologic oncology patients. *Arch Gynecol Obstet*. 2017;295(5):1219-26.
- 220 [15] J No JH, Kim K, Kim YB, Suh DH, Yang EJ, Hwang H, et al. Effects of an activity tracker with  
221 feedback on physical activity in women after midline laparotomy: A randomized controlled trial. *J Obstet*  
222 *Gynaecol Res*. 2021;47(7):2544-50.

Review of 53 patients enrolled in a randomized control trial:  
Effects of an activity tracker with feedback on physical activity in  
women after midline laparotomy

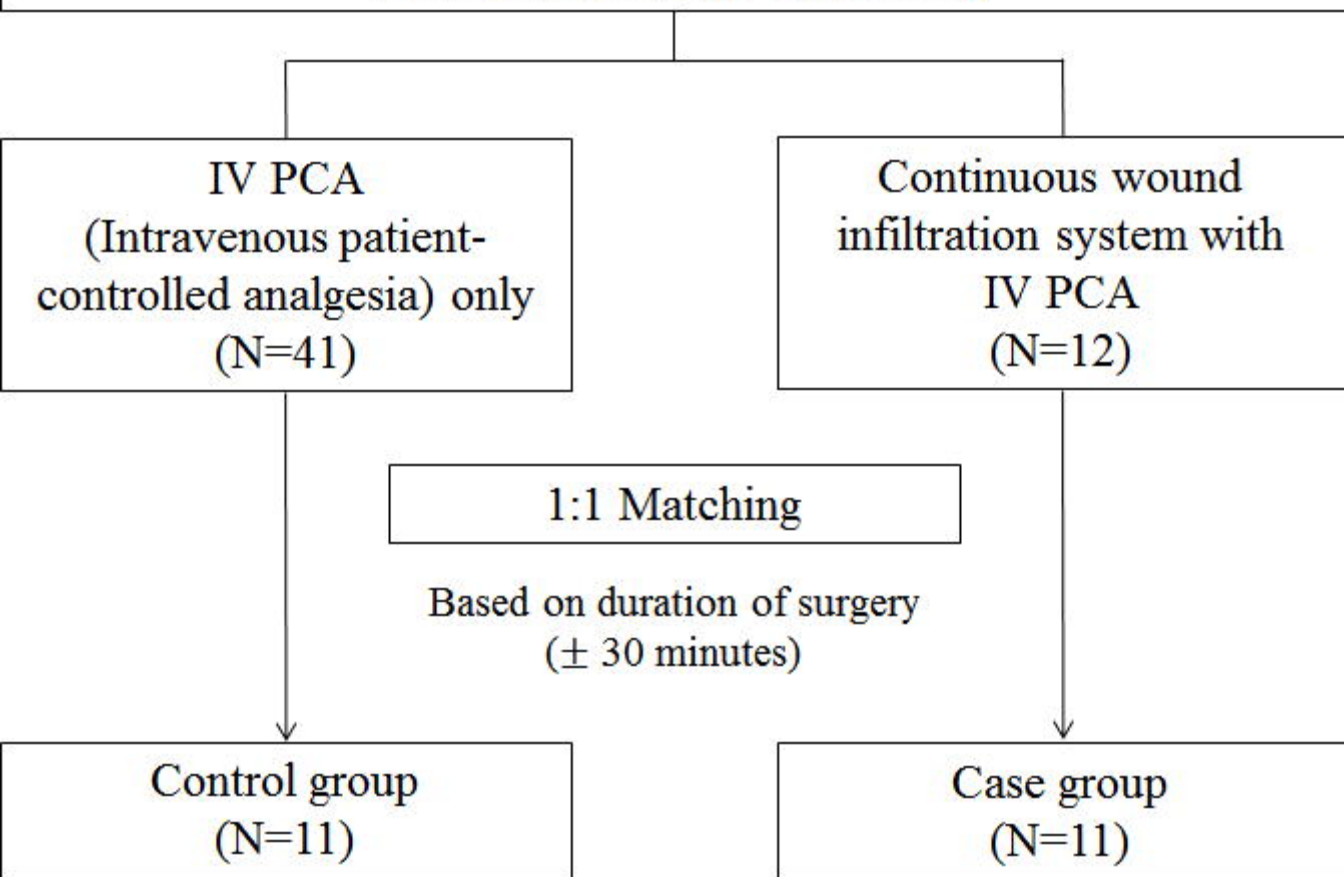

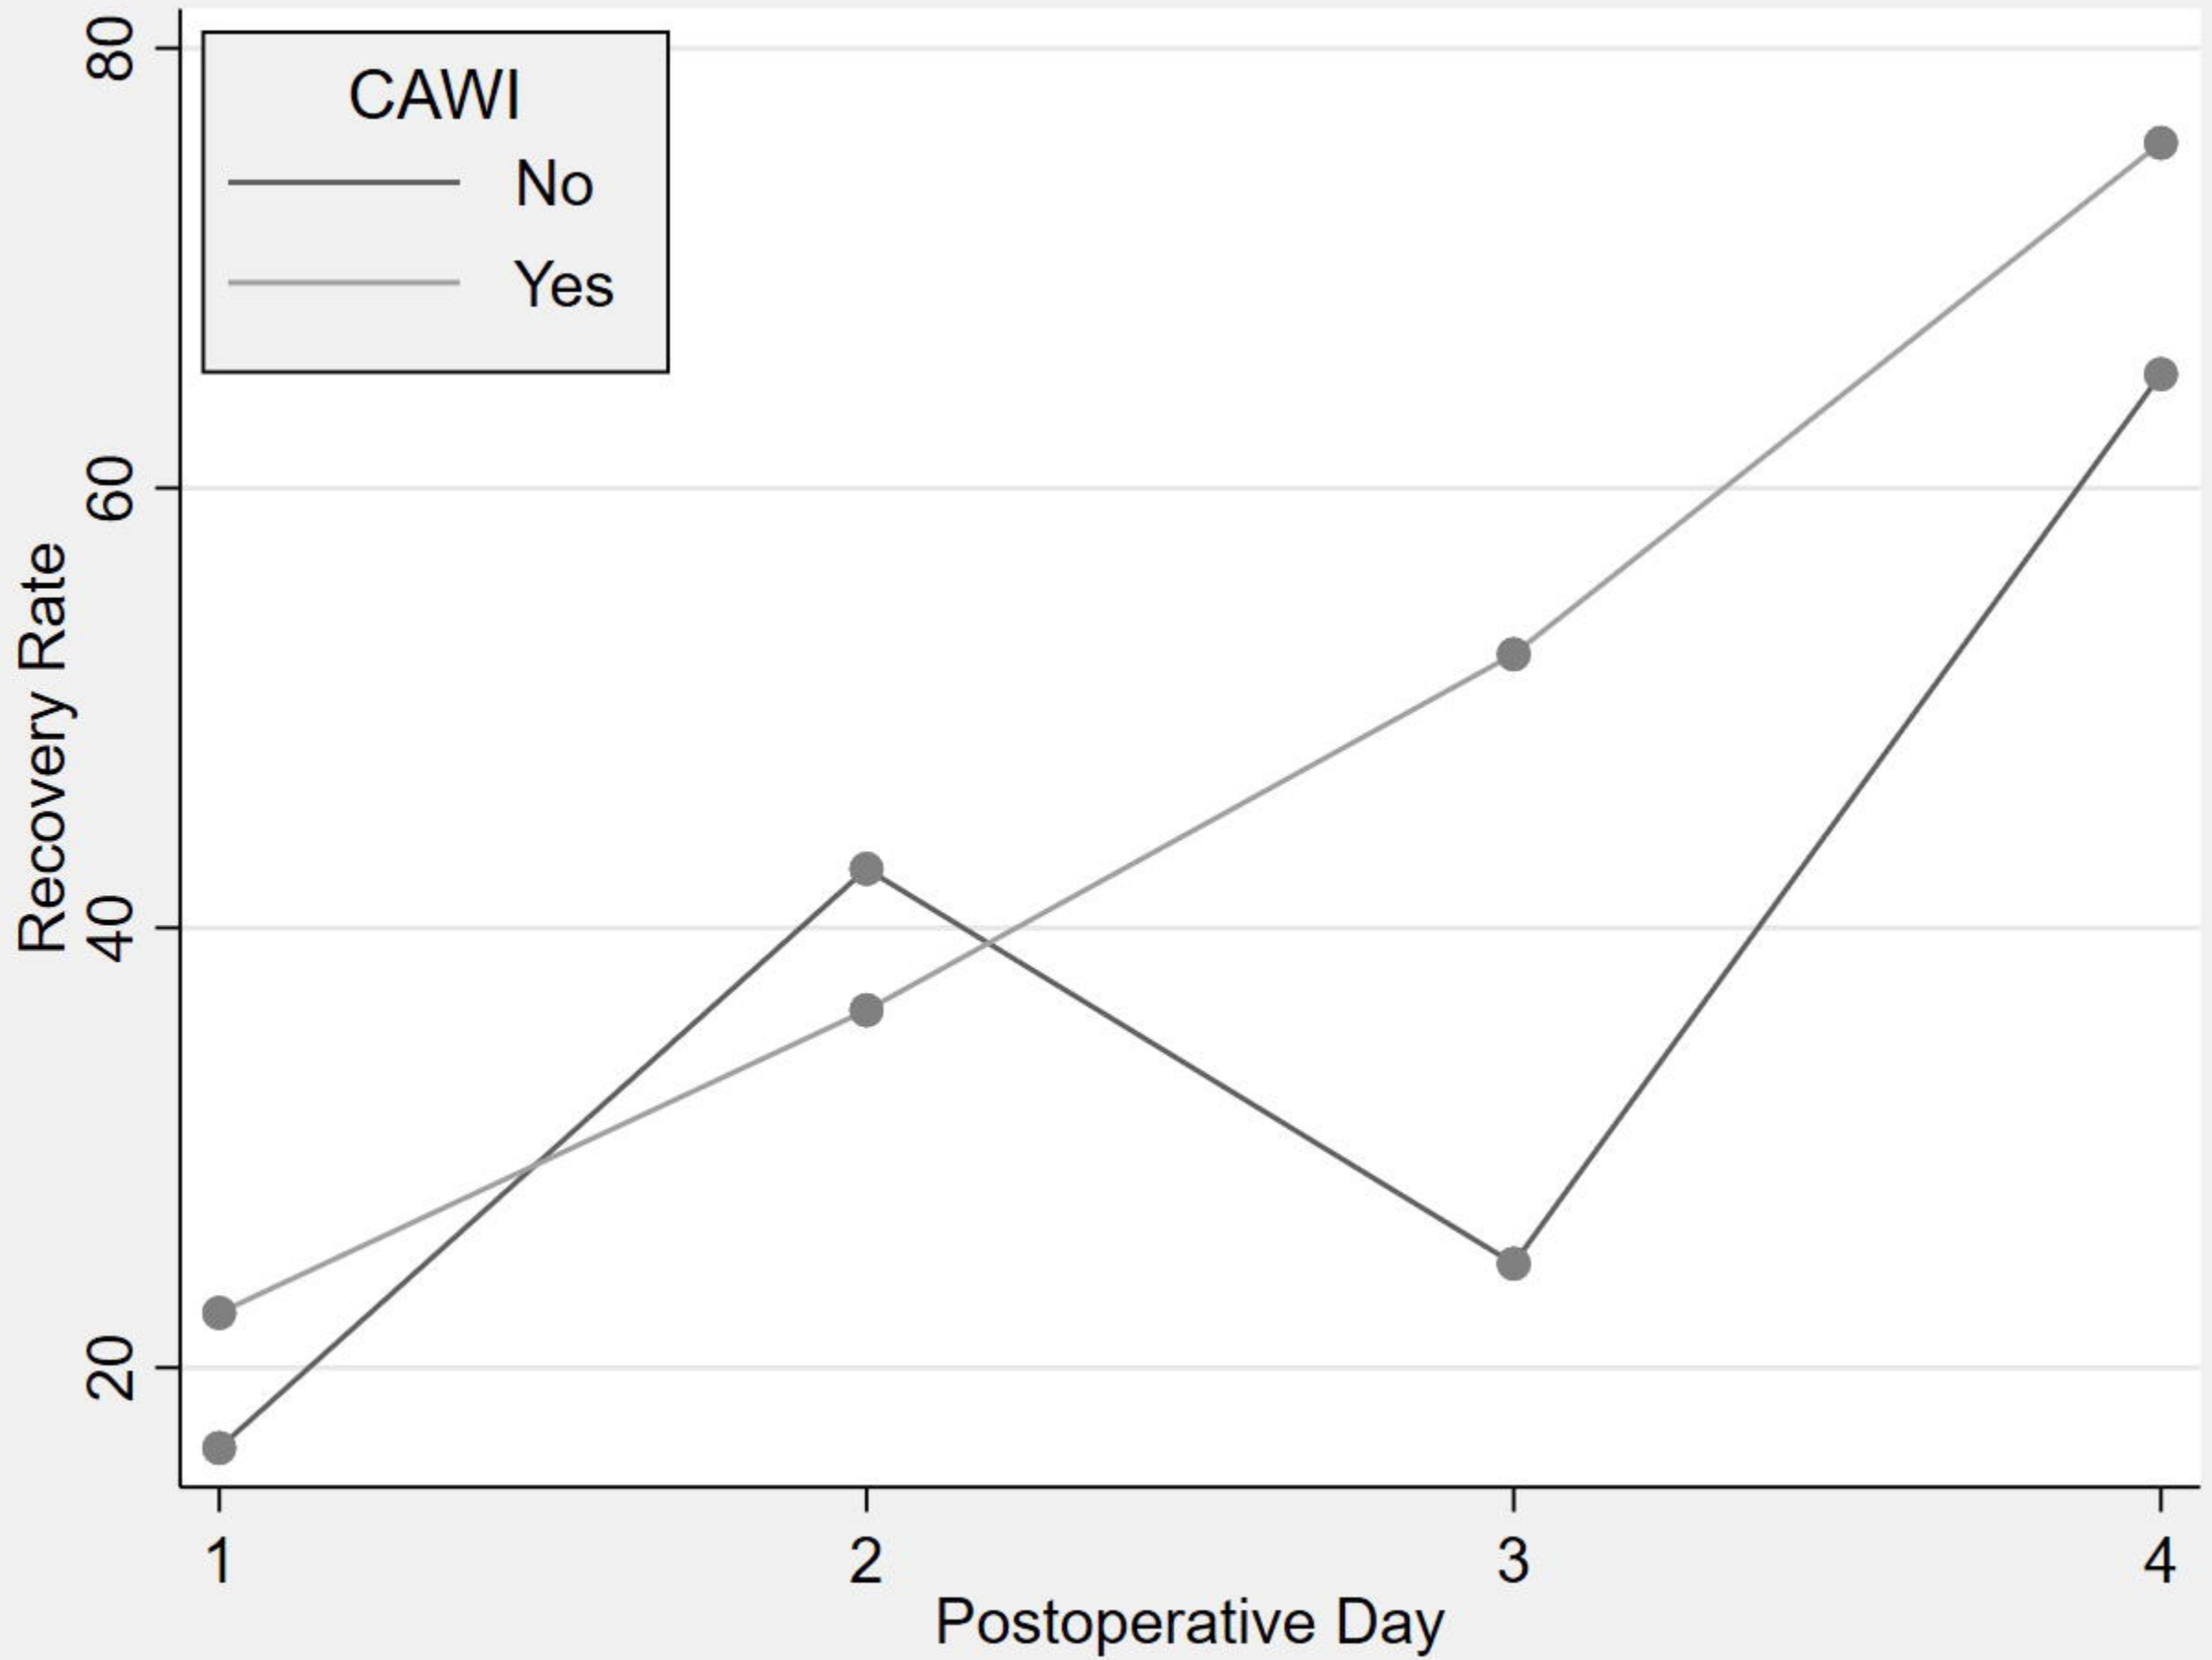

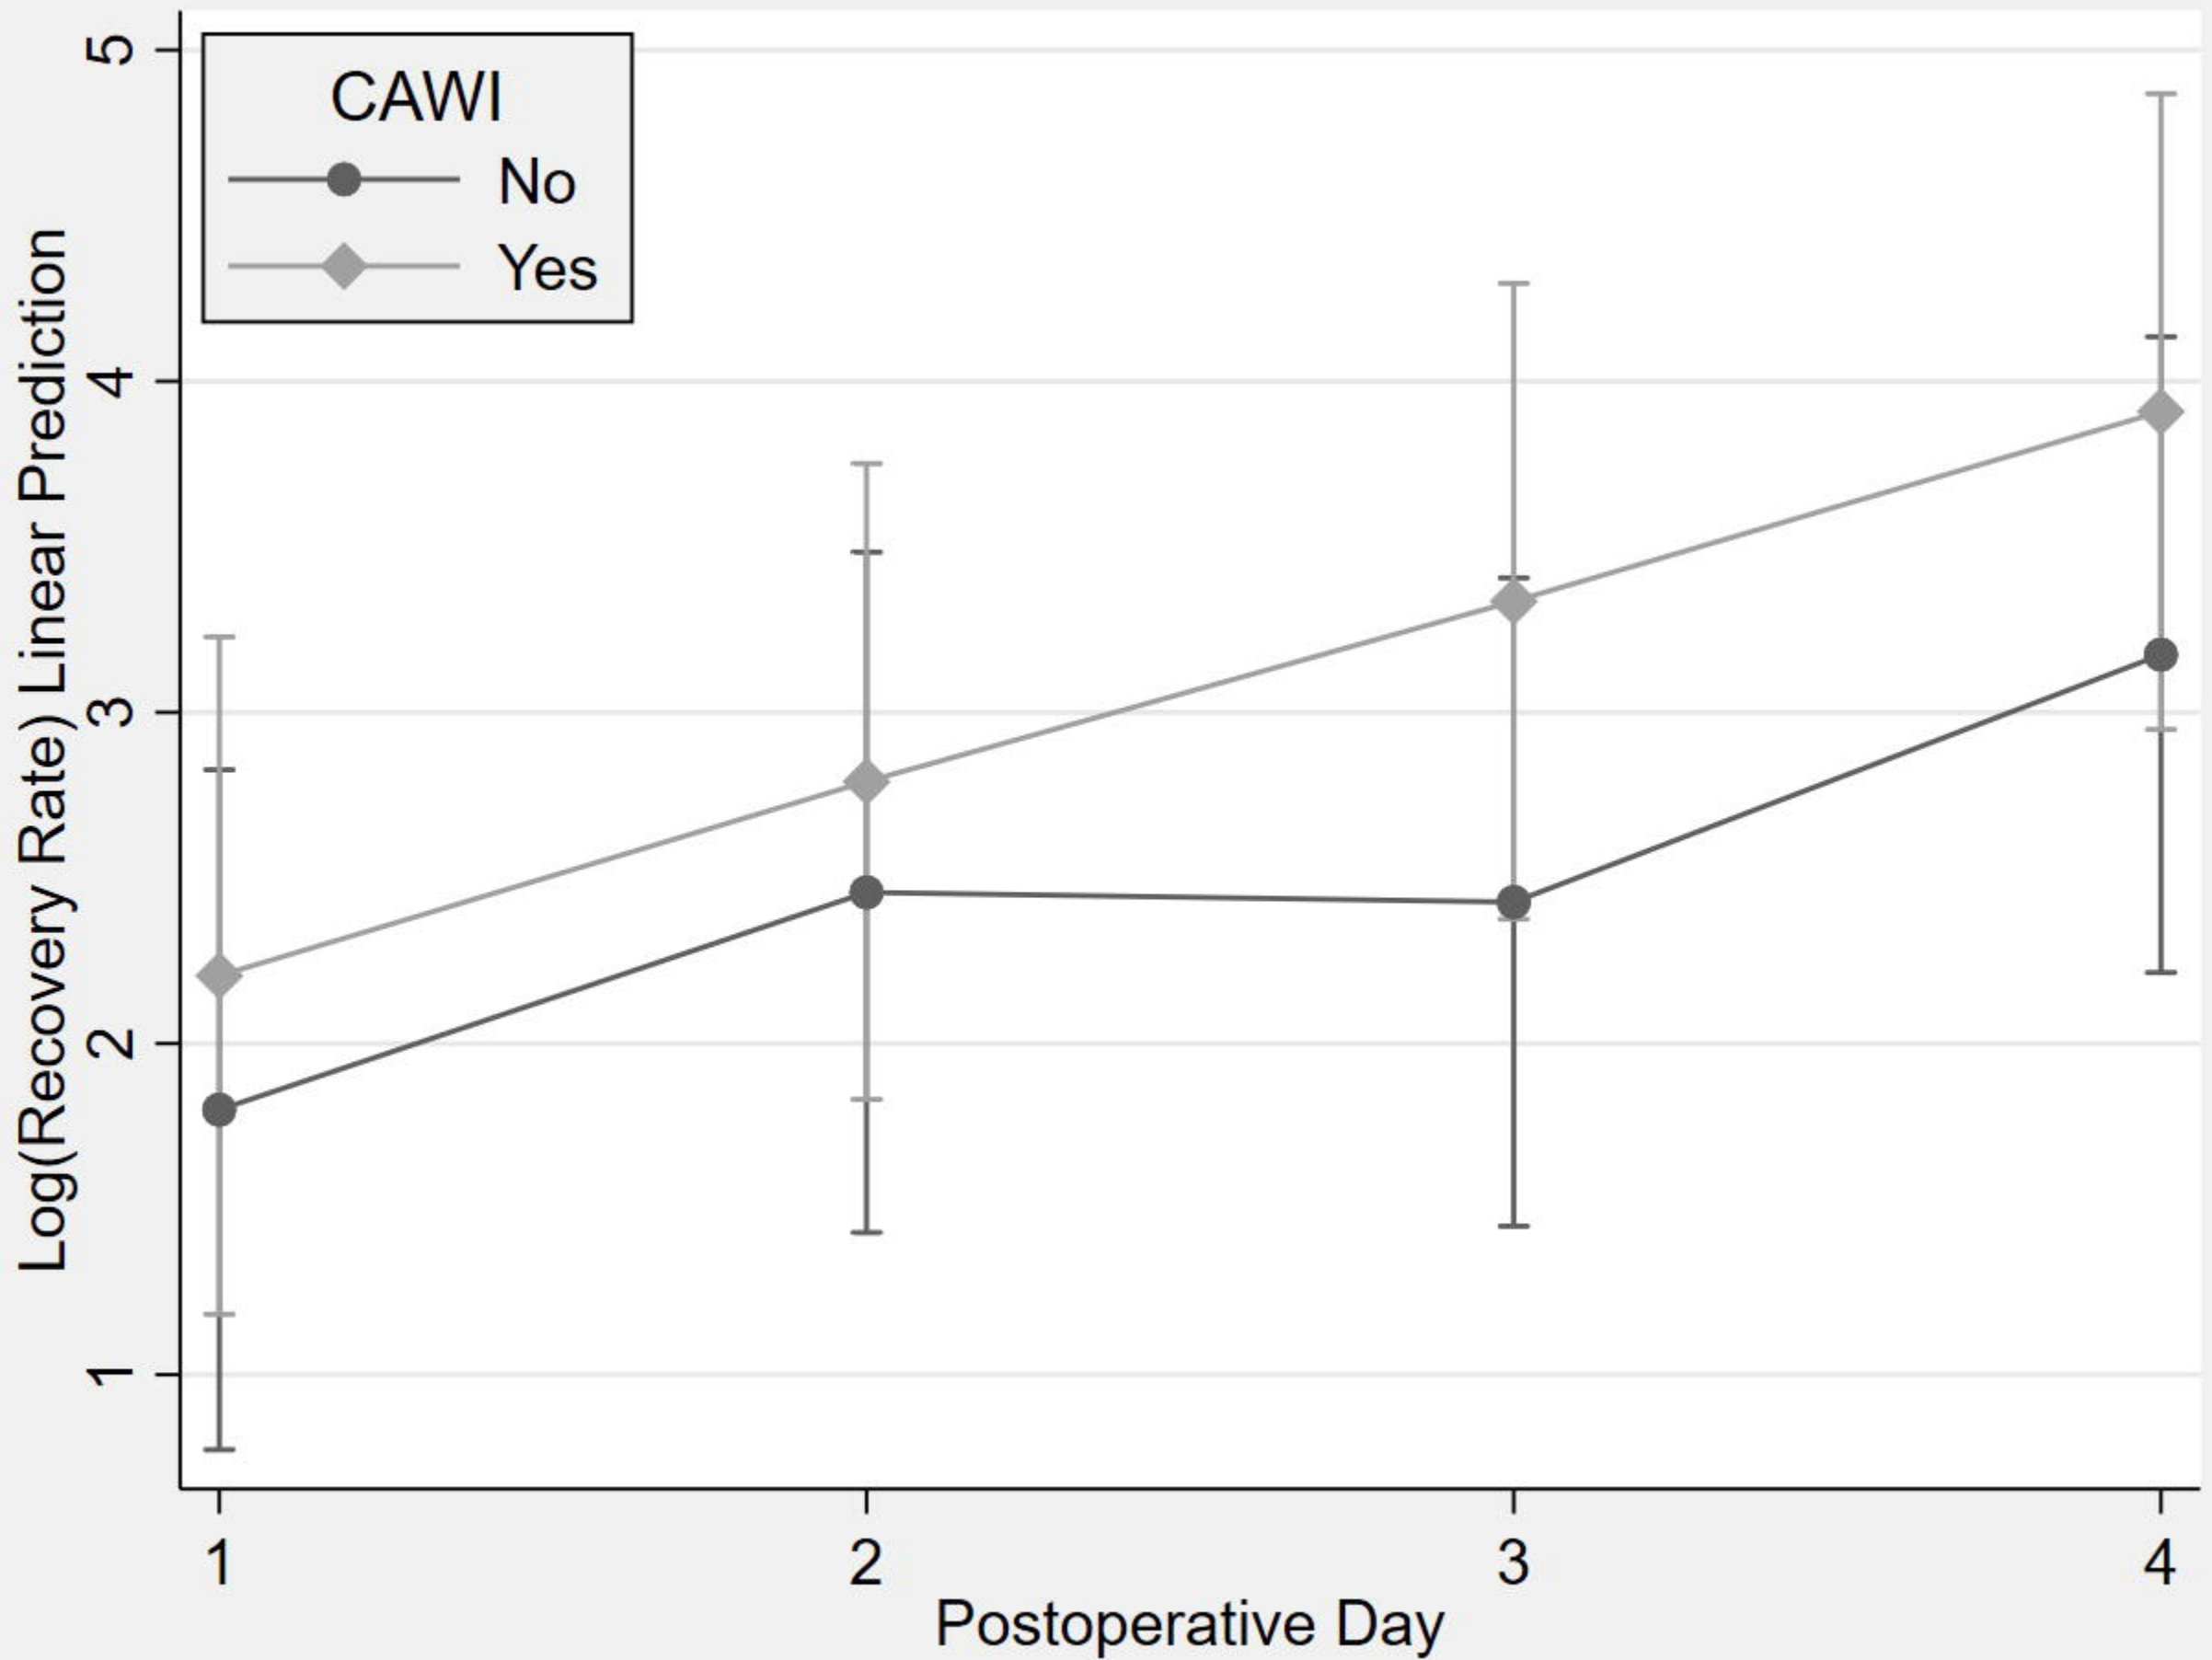

Source: https://medrxiv.org/content/10.1101/2023.02.19.23286163.full.pdf
